# Supplementary material for: Three-Dimensional Spheroid Configurations and Cellular Metabolic Properties of Oral Squamous Carcinomas Are Possible Pharmacological and Pathological Indicators
Source: MDPI journal article supplement (doi:10.3390/cancers15102793), 2023-05-17
Supplement: s1 [file s1]

**Supplementary file**  
**Table S1**

|       |        |                         |                         |                                                 |           |        |
|-------|--------|-------------------------|-------------------------|-------------------------------------------------|-----------|--------|
| KRAS  | Taqman | TGCCCTACATCTTATTCCTCAG  | CCTACTGTCGCTAATGGATTGG  | /56-FAM/AGGTGGTGG/ZEN/CTGATGCTTTGAACA/3IABkFQ/  | NM_033360 | 6-6    |
| SOX2  | Taqman | GTACAACTCCATGACCAGCTC   | CTTGACCACGAACCCAT       | /56-FAM/CACCTACAG/ZEN/CATGTCCTACTCGCA/3IABkFQ/  | NM_003106 | 1-1    |
| MITF  | Taqman | CTCACCATCAGCAACTCCTG    | GATTGTCCTTTTTCTGCCTCTC  | /56-FAM/AGCTCACAG/ZEN/CGTGTATTTTCCCACA/3IABkFQ/ | NM_000248 | 11-12a |
| COL4  | Taqman | TGAGTCAGGCTTCATTATGTTCT | AGAGAGGAGCGAGATGTTCA    | /56-FAM/TCATACAGA/ZEN/CTTGGCAGCGGCT/3IABkFQ/    | NM_001845 | 51-52  |
| COL6  | Taqman | GTGAGGCCTTGGATGATCTC    | CCTCGTGGACAAAGTCAAGT    | /56-FAM/CAGGTTTCG/ZEN/GTCACAGCGGTAGT/3IABkFQ/   | NM_001848 | 2-3    |
| FN1   | Taqman | ACCAATCTTGTAGGACTGACC   | CGTCCTAAAGACTCCATGATCTG | /56-FAM/TACAGCTTA/ZEN/TTCTCCCTCGCCCAG/3IABkFQ/  | NM_212482 | 3-4    |
| PGC1a | Taqman | GAGTCTGTTATGGAGTGACATCG | TGTCTGTATCCAAGTCGTTAC   | /56-FAM/ACCAGCCTC/ZEN/TTTGCCAGATCTTC/3IABkFQ/   | NM_013261 | 1-2    |
